# Supplementary material for: Effects of Seed Endophytic Bacteria on Life History and Reproductive Traits in a Cosmopolitan Weed, Capsella bursa-pastoris
Source: MDPI journal article supplement (doi:10.3390/plants11192642), 2022-10-08
Supplement: s1 [file s1]

Table S1. Geographic and climatic information of source populations. Average values for 20 years from 1997 to 2017 are given. MT, monthly mean temperature; MT\_S, mean temperature in spring season; MT\_A, mean temperature in autumn season; SMP, the sum of monthly precipitation. All values were calculated using the Automatic Weather Station (AWS) database provided by Korea Meteorological Administration (KMA).

| Populations | Altitude (m) | Geographic coordinates        | MT (°C) | MT_S (°C) | MT_A (°C) | SMP (mm) |
|-------------|--------------|-------------------------------|---------|-----------|-----------|----------|
| BOP         | 719          | 37.42'45.7"N<br>128.24'10.0"E | 8.90    | 7.96      | 9.47      | 116.70   |
| MZS         | 862          | 35.54'00.8"N<br>127.50'10.3"E | 9.95    | 9.64      | 11.27     | 112.46   |
| ICH         | 68           | 37.19'48.0"N<br>127.27'51.3"E | 14.15   | 13.35     | 16.09     | 119.20   |
| DMY         | 30           | 35.16'12.5"N<br>126.56'29.0"E | 13.29   | 12.90     | 14.84     | 115.57   |

Table S2. Results of generalized mixed model analyses comparing plant traits among bacterial treatments and plant populations. The block, genotype nested by plant population, and genotype by treatment interaction were included as random factors. Chi-square values are given for the binary germination season and bolting success, and F ratios for the other traits are given. †  $P < 0.10$ , \*  $P < 0.05$ , \*\*  $P < 0.01$ .

| Trait                | Treatment<br>(d.f = 4) | Population<br>(d.f = 3) | Treatment × population<br>(d.f = 12) |
|----------------------|------------------------|-------------------------|--------------------------------------|
| Germination rate     | 2.74*                  | 5.68**                  | 1.11                                 |
| Germination season   | 9.58*                  | 10.17*                  | 9.75                                 |
| Bolting success      | 0.42                   | 14.14**                 | 7.06                                 |
| Flowering date       | 2.69*                  | 4.04*                   | 1.24                                 |
| Rosette diameter     | 2.22†                  | 2.91*                   | 1.22                                 |
| Inflorescence height | 2.99*                  | 2.38†                   | 2.23*                                |
| Branch number        | 3.43*                  | 2.01                    | 0.97                                 |
| Fruits number        | 3.18*                  | 1.88                    | 0.85                                 |

Table S3. Results of analyses of covariance to compare path coefficients among bacterial treatments. Significant trait by bacterial strain interaction indicates that path coefficients differed among bacterial strains. \*  $P < 0.05$ .

| Path                        |                             | $F_{\text{trait} \times \text{bacterial strain}}$<br>(d.f. = 3) |
|-----------------------------|-----------------------------|-----------------------------------------------------------------|
| From                        | To                          |                                                                 |
| Bacterial treatment         | Binary germination season   | 0.44                                                            |
| Bacterial treatment         | Rosette diameter at bolting | 1.01                                                            |
| Binary germination season   |                             | 0.88                                                            |
| Bacterial treatment         | Flowering date              | 0.97                                                            |
| Binary germination season   |                             | 0.66                                                            |
| Bacterial treatment         | Inflorescence height        | 0.37                                                            |
| Binary germination season   |                             | 0.07                                                            |
| Rosette diameter at bolting |                             | 0.07                                                            |
| Flowering date              |                             | 1.69                                                            |
| Bacterial treatment         | Inflorescence branch number | 1.34                                                            |
| Binary germination season   |                             | 0.48                                                            |
| Rosette diameter at bolting |                             | 1.50                                                            |
| Flowering date              |                             | 0.48                                                            |
| Bacterial treatment         | Fruit number                | 0.99                                                            |
| Binary germination season   |                             | 0.71                                                            |
| Rosette diameter at bolting |                             | 0.33                                                            |
| Flowering date              |                             | 0.18                                                            |
| Inflorescence height        |                             | 3.47*                                                           |
| Inflorescence branch number |                             | 0.78                                                            |
